# Supplementary figures and images for: Induction of human somatostatin and parvalbumin neurons by expressing a single transcription factor LIM homeobox 6
Source: eLife journal article supplement (doi:10.7554/elife.37382), 2018-09-25

Figure 6-figure supplement 1

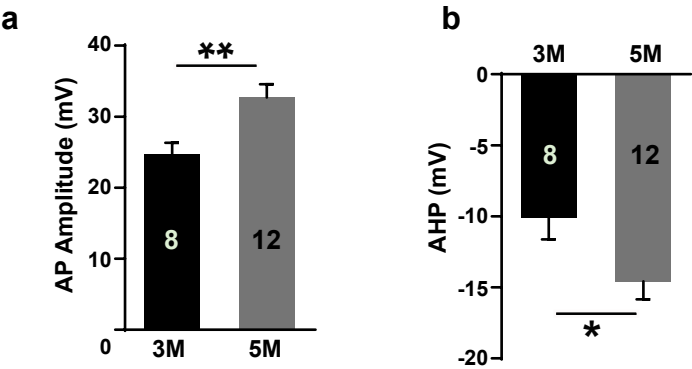

Supplement: supp [file elife-37382-supp-v1.zip]

Figure 3-figure supplement 1

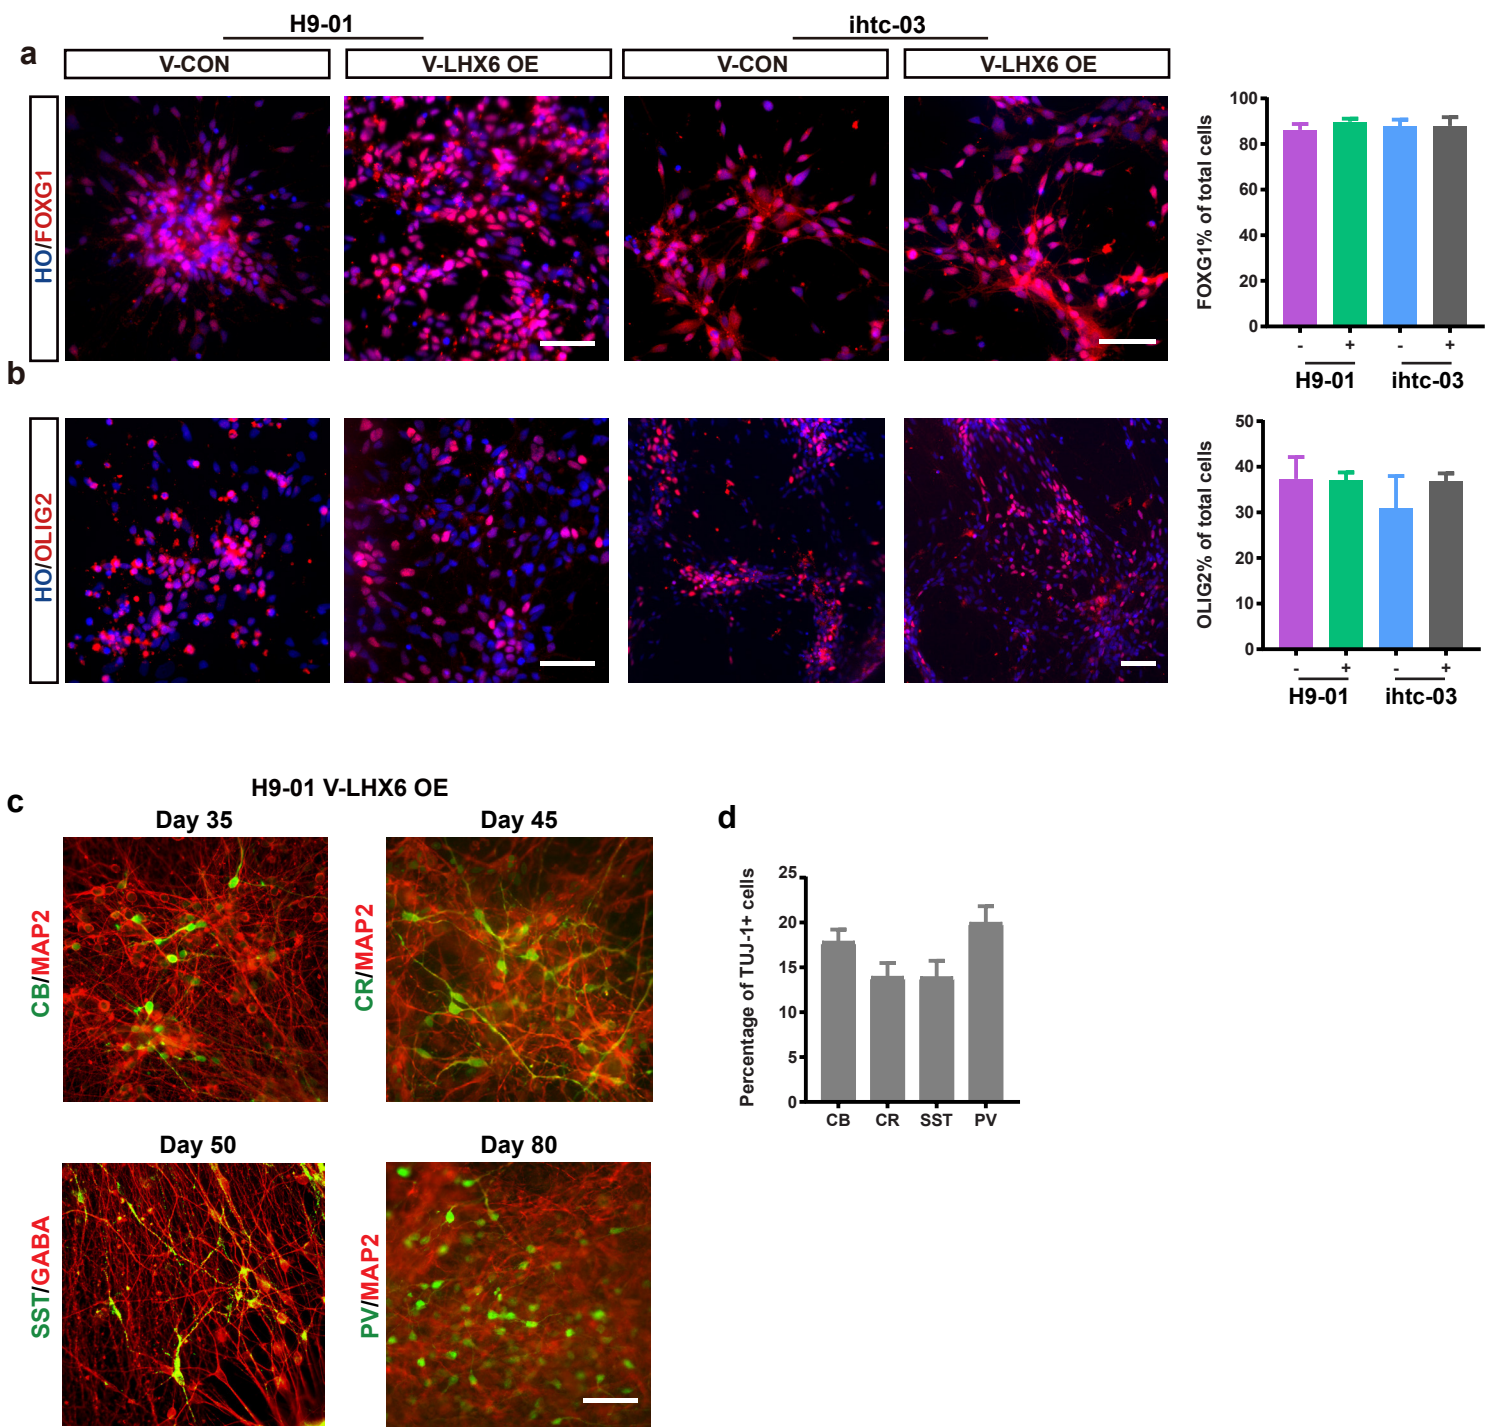

Supplement: supp [file elife-37382-supp-v1.zip]

Supplementary Figure 3

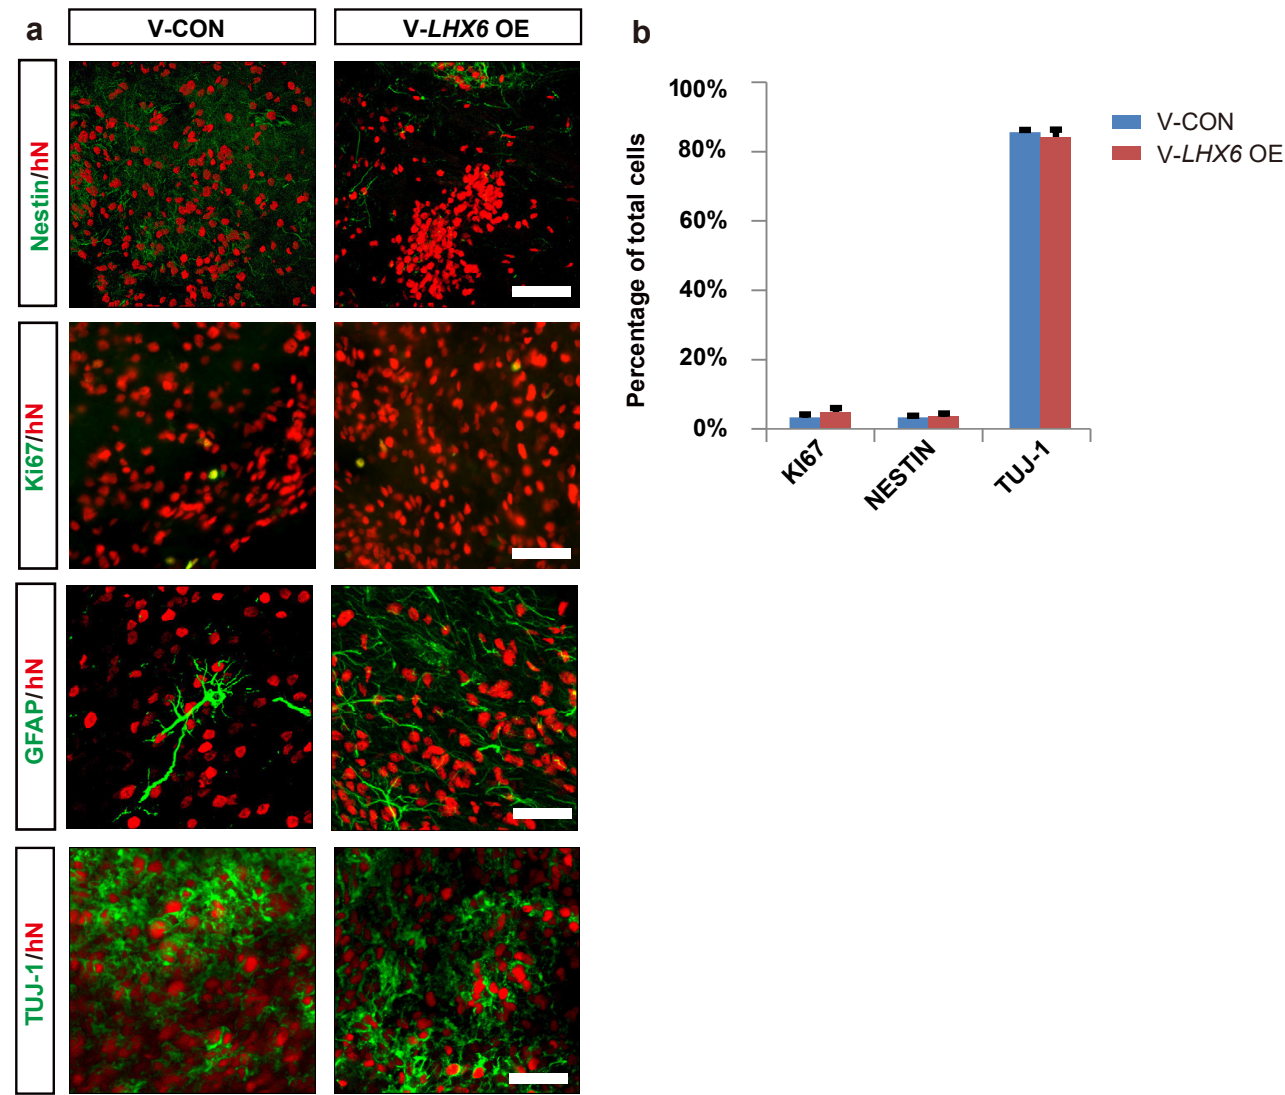

Supplement: supp [file elife-37382-supp-v1.zip]
